# Supplementary material for: Recognizing Minor Leukemic Populations with Monocytic Features in Mixed-Phenotype Acute Leukemia by Flow Cell Sorting Followed by Cytogenetic and Molecular Studies: Report of Five Exemplary Cases
Source: MDPI journal article supplement (doi:10.3390/ijms24065260), 2023-03-09
Supplement: s1 [file s1]

**Table S1.** Patient demographics and cytological and genetic findings

| Patient | Age/Sex | Morphology and Cytochemistry                                                                                                                                                                                                                                    | Immunophenotyping                                                                              |                                                                                                     | Cytogenetics                                                                        |
|---------|---------|-----------------------------------------------------------------------------------------------------------------------------------------------------------------------------------------------------------------------------------------------------------------|------------------------------------------------------------------------------------------------|-----------------------------------------------------------------------------------------------------|-------------------------------------------------------------------------------------|
|         |         |                                                                                                                                                                                                                                                                 | B-cell population                                                                              | Monocytic/myeloid population                                                                        |                                                                                     |
| #1      | 5 m/F   | Anaplastic blasts with lymphoid differentiation features negative for MPO, SBB, ANAE, PAS                                                                                                                                                                       | BI, 90%: CD19+, CD79a+, CD45+, CD15+, NG2+, negative for CD10, CD22, MPO and lysozyme          | 7%: CD33+, CD14+, CD64+, CD45+, CD15+, weak CD19 and CD79a, negative for NG2, positive for lysozyme | 46,XX, t(11;19)(q23;p13.3) [20]; positive for t(11;19) by FISH                      |
| #2      | 11 y/M  | 25%: small blasts with round nuclei, high N:CR, basophilic cytoplasm; negative for MPO, SBB, ANAE, partially positive for PAS<br>60%: intermediate to large blasts with round nuclei and variable N:CR; positive for MPO, SBB, ANAE, partially positive for PAS | BII, 42%: CD19+, CD10+, CD79a+, CD45+, CD34+, CD13+, negative for CD22, MPO and lysozyme       | 38%: CD33+, CD13+, CD45+, CD15+, weak CD19 and CD79a, CD34+, CD117+, positive for MPO               | No metaphases; positive for t(9;22)(q34;q11) by FISH                                |
| #3      | 3 m/F   | 67-82%: small blasts with high N:CR; negative for MPO, SBB, ANAE, positive for PAS<br>3-10%: intermediate to large blasts with round nuclei and medium N:CR; negative for ANAE, positive for MPO, SBB, PAS                                                      | BI, 42%: CD19+, CD22+, CD79a+, CD45+, CD34+, CD13+, CD33+, negative for CD10, MPO and lysozyme | 7%: CD33+, CD14+, CD64+, CD13+, CD45+, CD15+, weak CD19 and CD79a, positive for MPO and lysozyme    | 46,XX, t(12;17)(p13;q13), del(20q) [5]; positive for a ZNF384 rearrangement by FISH |

|    |        |                                                                                                                                                                                                                                                                                  |                                                                                 |                                                                                    |       |
|----|--------|----------------------------------------------------------------------------------------------------------------------------------------------------------------------------------------------------------------------------------------------------------------------------------|---------------------------------------------------------------------------------|------------------------------------------------------------------------------------|-------|
| #4 | 18 y/M | Anaplastic blasts with lymphoid differentiation features, negative for MPO, SBB, ANAE, PAS. Poor quality of BM smears                                                                                                                                                            | BII, 65%: CD19+, weak CD10, CD79a+, CD45+, negative for CD22, MPO and lysozyme  | 7%: CD33+, CD14+, CD64+, CD13+, CD45+, weak CD19, positive for lysozyme            | 46,XY |
| #5 | 15 y/F | 89%: small blasts with round nuclei, high N:CR, basophilic cytoplasm; negative for MPO, SBB, ANAE, partially positive for PAS<br>11%: intermediate blasts with round or irregular nuclei and variable N:CR, negative for MPO, ANAE, positive for SBB, partially positive for PAS | BII, 85%: CD19+, weak CD10, CD22+, CD79a+, CD45+, negative for MPO and lysozyme | 12%: CD33+, CD14+, CD64+, CD13+, CD45+, weak CD19 and CD79a, positive for lysozyme | 46,XX |

N:CR, nucleus-to-cytoplasm ratio; MPO, myeloperoxidase; SBB, Sudan black B; PAS, periodic acid-Schiff reaction; ANAE,  $\alpha$ -naphthyl acetate-esterase; BM, bone marrow; m, months; y, years; F, female; M, male.
